# Supplementary material for: Destabilization mechanism of R3–R4 tau protofilament by purpurin: a molecular dynamics study
Source: Royal Society of Chemistry journal article supplement (doi:10.1039/d3cp01039b), 2023-01-01
Supplement: d3cp01039b1.pdf [file d3cp01039b1.pdf]

## Supporting information

### Destabilization mechanism of R3-R4 tau protofilament by purpurin: a molecular dynamics study

Jiaqian Wan<sup>a</sup>, Yu Zou<sup>b</sup>, Ruiqing Sun<sup>a</sup>, Zhengdong Xu<sup>a</sup>, Jiaying Tang<sup>a</sup>, Yehong Gong<sup>c</sup>, Guanghong Wei<sup>d,\*</sup> and Qingwen Zhang<sup>a,\*</sup>

<sup>a</sup> School of Physical Education, Shanghai University of Sport, 399 Changhai Road, Shanghai 200438, People's Republic of China

<sup>b</sup> Department of Sport and Exercise Science, College of Education, Zhejiang University, 886 Yuhangtang Road, Hangzhou 310058, People's Republic of China

<sup>c</sup> School of Sports Science and Engineering, East China University of Science and Technology, 130 Mei Long Road, Shanghai, 200237, People's Republic of China

<sup>d</sup> Department of Physics, State Key Laboratory of Surface Physics, and Key Laboratory for Computational Physical Sciences (Ministry of Education), Fudan University, Shanghai 200438, People's Republic of China

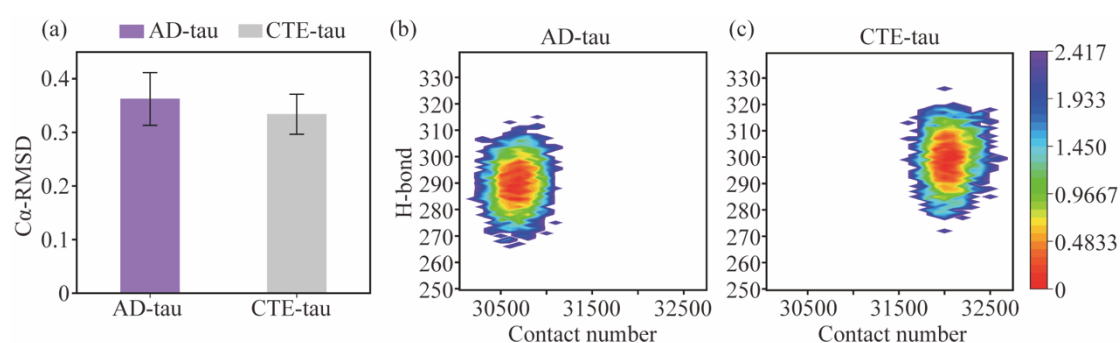

**Figure S1.** Statistics analysis of Cα-RMSD of AD-tau and CTE-tau(a). Potential mean force (in kcal/mol) of AD-tau(b) and CTE-tau(c) as functions of the H-bond number and contact number. The Cα-RMSD, contact number and H-bond was calculated using 250–450 ns data of three MD runs in AD-tau and CTE-tau system, respectively.

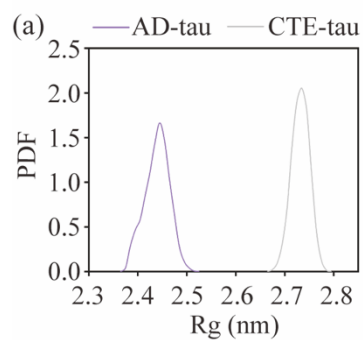

**Figure S2.** The PDF of radius of gyration ( $R_g$ ) of AD-tau (purple) and CTE-tau (grey).

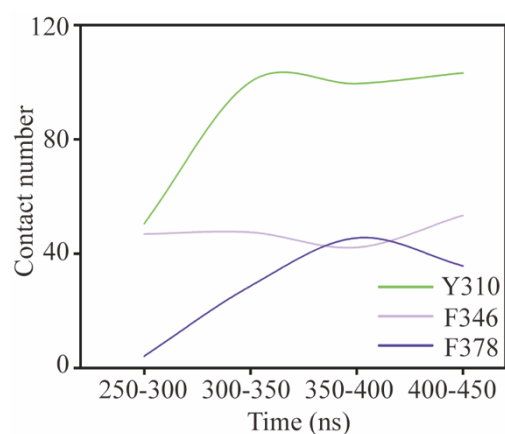

**Figure S3.** The contact number between Y310, F346, F378 and purpurin molecules at 250-300, 300-350, 350-400 and 400-450 ns.

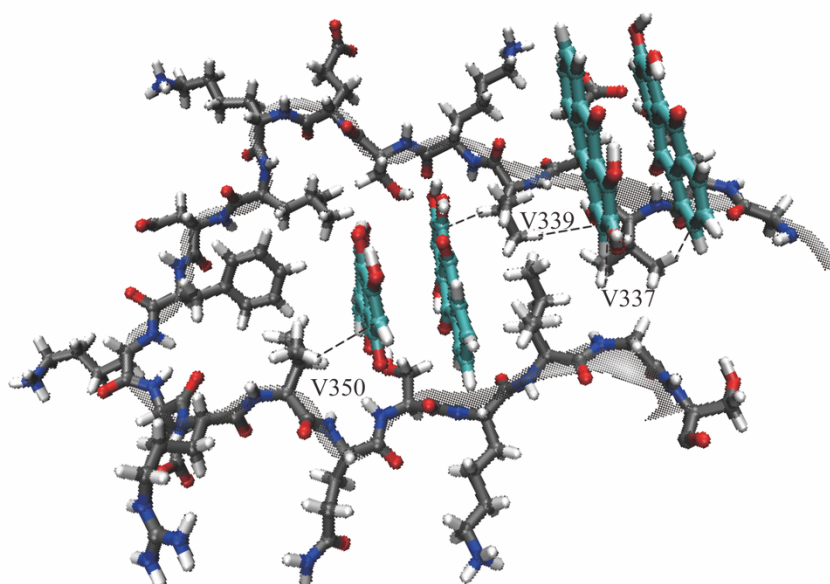

**Figure S4.** A snapshot of the hydrophobic contacts between purpurin and V337, V339, V350. The black dashed lines represent hydrophobic contacts.

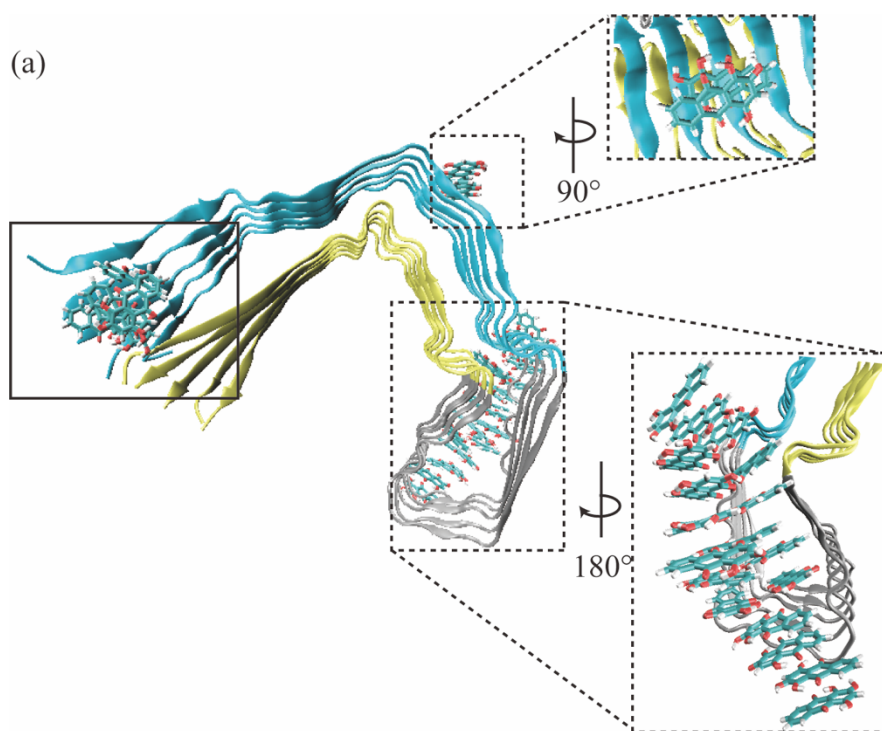

**Figure S5.** A respective snapshot showing the distribution of purpurin molecules on CTE-tau protofilament. Three squares are highlight the three regions where purpurin molecules contact with CTE-tau. The two dashed line squares are enlarged and shifted tp show the spatial distribution of purpurin and CTE-tau protofilament. Tau protofilament are divided to three regions. S305-G335 (blue), Q336-G355 (gray) and N356-R379 (yellow).
